# Supplementary material for: A Multi-Color Flow Cytometric Assay for Quantifying Dinutuximab Binding to Neuroblastoma Cells in Tumor, Bone Marrow, and Blood
Source: MDPI journal article supplement (doi:10.3390/jcm12196223), 2023-09-27
Supplement: s1 [file s1]

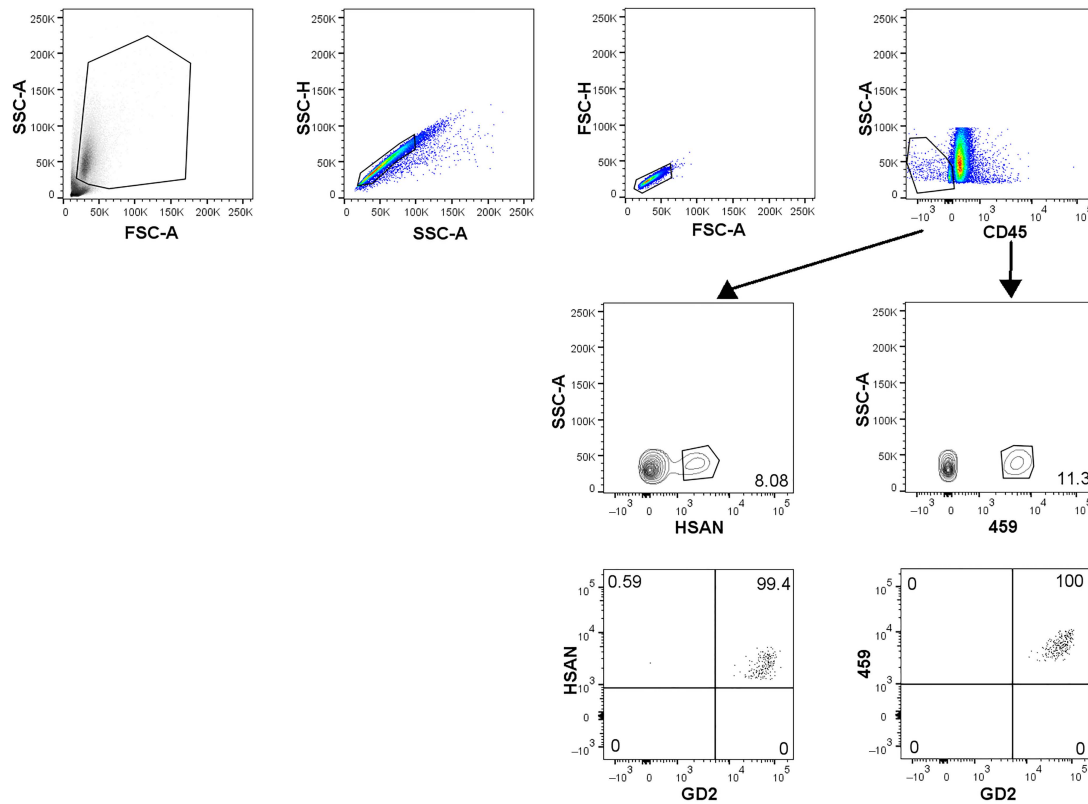

**Figure S1. Gating strategy for patient bone marrow using a 3-color antibody cocktail.** Cells were selected from debris using forward (FSC) and side (SSC) scatter. Singlets were gated on twice, using both SSC and FSC. The CD45<sup>+</sup> population was gated on and then from that population, either HSAN<sup>+</sup> or 459<sup>+</sup> cells were identified. From each subsequent gate (either CD45/HSAN<sup>+</sup> or CD45/459<sup>+</sup>) GD2<sup>+</sup> cells were gated on.

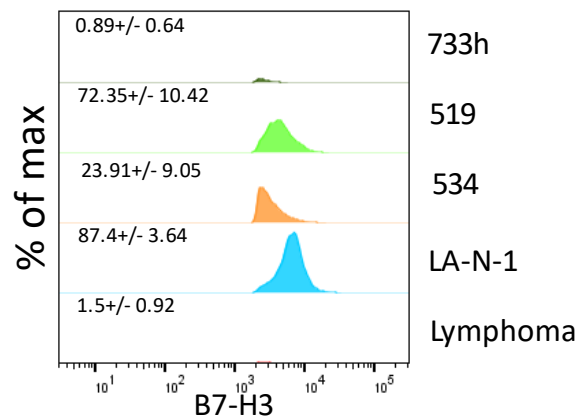

**Figure S2. B7-H3 staining profile in neuroblastoma panel.** B7-H3 surface staining was assessed on a panel of four neuroblastoma cell lines in addition to the B cell lymphoma negative control. Average % positive from three replicates shown as numbers +/- standard deviation.
